# Supplementary material for: Assessment of Diet Quality and Adherence to Dietary Guidelines in Gastrointestinal Cancer Survivors: A Cross-Sectional Study
Source: MDPI journal article supplement (doi:10.3390/nu12082232), 2020-07-27
Supplement: s1 [file s1]

**Table S1.** LLD score-2018 and food components in GI cancers survivors and reference population, Lifelines 2006-2009

|                           | GI cancers survivors<br>(n=307) | Reference<br>population (n=3070) |                        |
|---------------------------|---------------------------------|----------------------------------|------------------------|
|                           | Mean (SD)                       | Mean (SD)                        | (P-value) <sup>2</sup> |
| LLDS                      | 25.71 (5.92)                    | 25.92 (5.91)                     | 0.35                   |
| Desired food component    |                                 |                                  |                        |
| Vegetables                | 102.51 (54.93)                  | 107.39 (57.51)                   | 0.05                   |
| Fruits                    | 180.85 (115.53)                 | 173.06 (126.94)                  | 0.45                   |
| Whole grain products      | 101.69 (51.57)                  | 109.28 (53.39)                   | 0.11                   |
| Legumes and Nuts          | 24.06 (26.49)                   | 22.85 (22.26)                    | 0.72                   |
| Fish                      | 17.67 (17.81)                   | 14.52 (13.56)                    | 0.80                   |
| Oil and soft margarine    | 15.03 (16.40)                   | 16.07 (16.99)                    | 0.71                   |
| Unsweetened dairy         | 210.25 (193.76)                 | 194.41 (157.37)                  | 0.91                   |
| Coffee                    | 440.14 (226.37)                 | 460.63 (234.53)                  | 0.46                   |
| Tea                       | 266.80 (227.80)                 | 251.41 (230.31)                  | 0.00                   |
| Undesired food component  |                                 |                                  |                        |
| Red and Processed meat    | 61.54 (33.46)                   | 62.65 (32.08)                    | 0.09                   |
| Butter, hard margarine    | 31.26 (24.39)                   | 29.81 (23.53)                    | 0.33                   |
| Sugar sweetened beverages | 109.51 (157.24)                 | 96.13 (133.16)                   | 0.26                   |
| Daily alcohol intake      | 7.49 (8.88)                     | 7.77 (9.09)                      | 0.41                   |

<sup>1</sup>All food components are presented in mean intake in grams per day.

<sup>2</sup>Results from a multivariate linear regression adjusted for age, sex, smoking, BMI, education level and physical activity

**Abbreviations:** CI, confidence interval; LLD, life Line diet; MD, mean difference; SD, standard deviation.

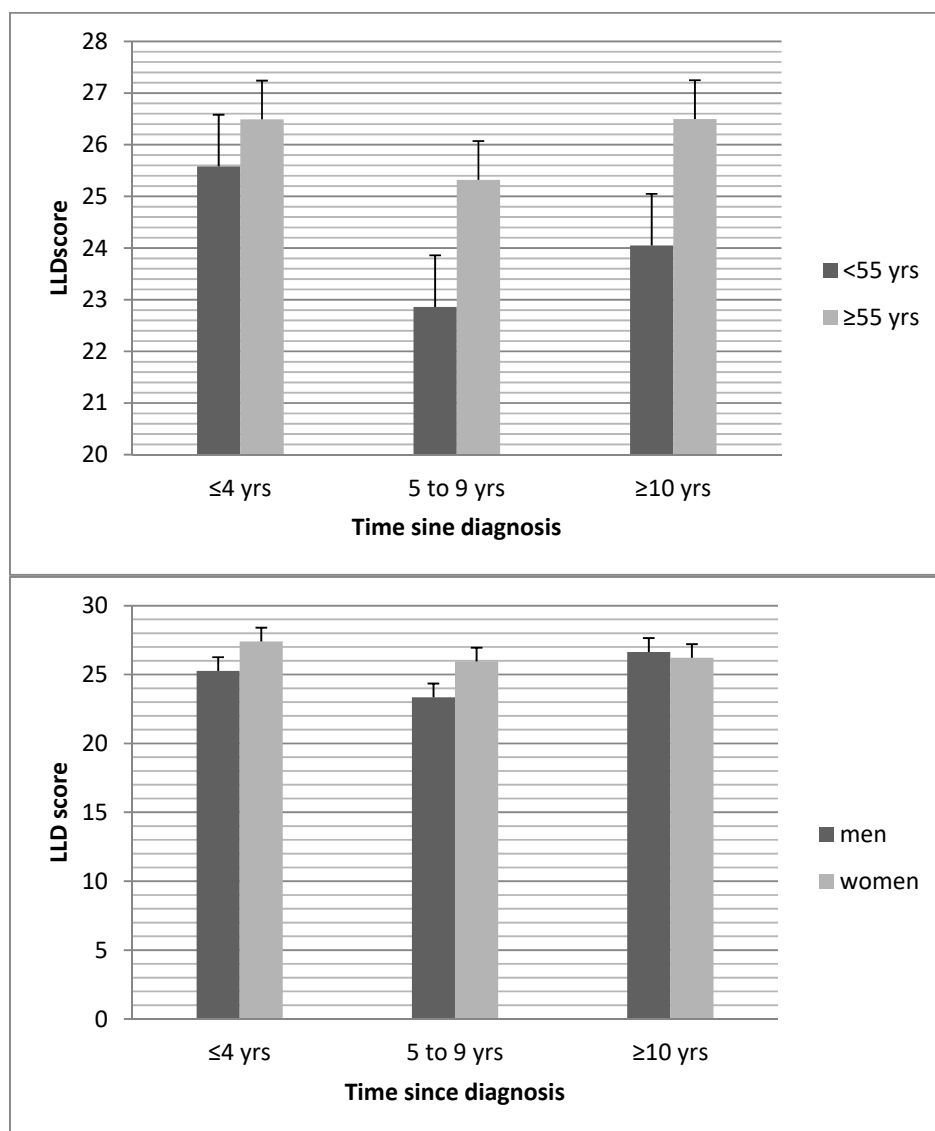

**Figure S1:** Mean LLD score according to age and sex category among GI cancers survivors stratified by time since diagnosis, Lifeline Study (2006-2009).

**Abbreviations:** GI, gastrointestinal; LLD, life Line diet.

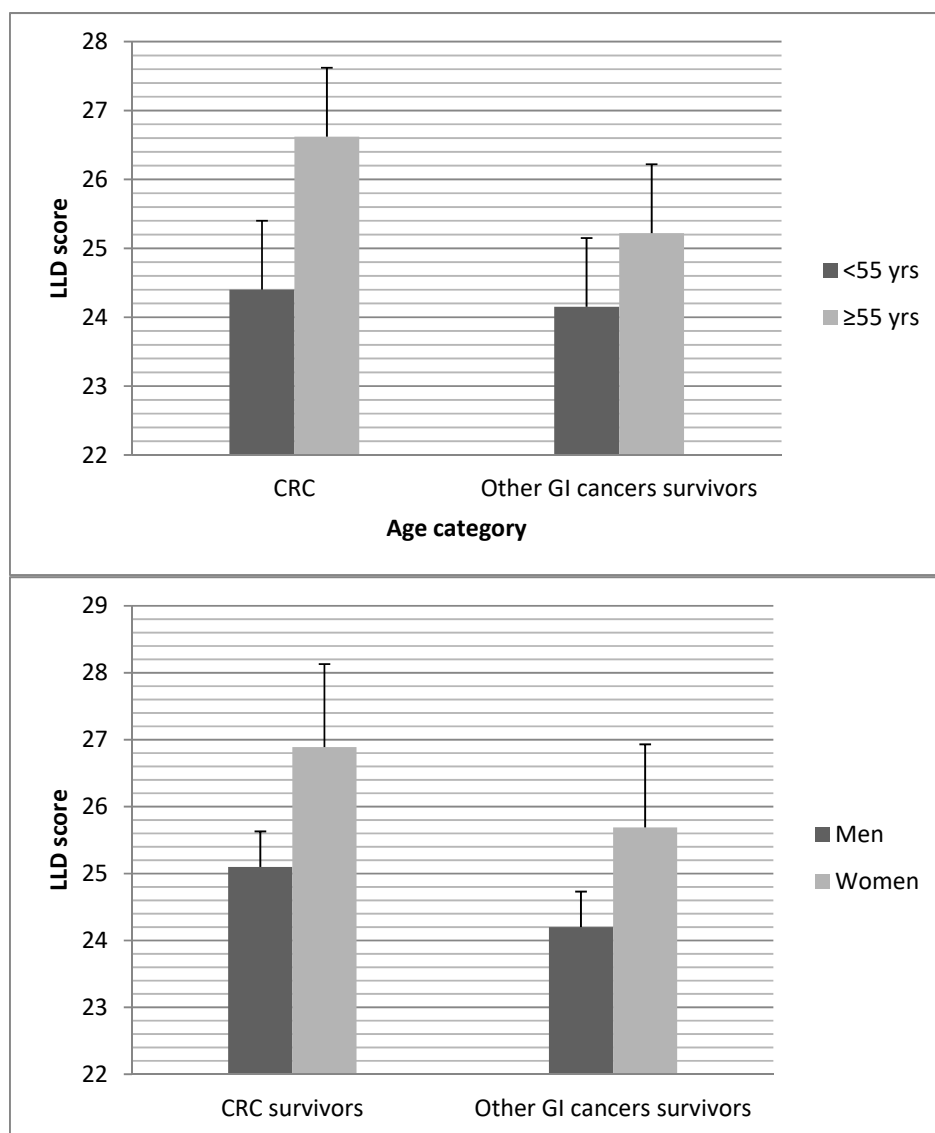

**Figure S2.** Mean LLD score according to age and sex category among GI cancers survivors stratified by tumour site, Lifeline Study (2006-2009).
